# Supplementary material for: β-amino acids reduce ternary complex stability and alter the translation elongation mechanism
Source: PubMed Central journal article supplement — bioRxiv. 2024 Feb 27:2024.02.24.581891. Preprint. [Version 2] doi: 10.1101/2024.02.24.581891 (PMC10925103; doi:10.1101/2024.02.24.581891), 2024-02-27
Supplement: NIHPP2024.02.24.581891v2-supplement-1.pdf [file NIHPP2024.02.24.581891v2-supplement-1.pdf]

## **$\beta$ -amino acids reduce ternary complex stability and alter the translation elongation mechanism**

F. Aaron Cruz-Navarrete<sup>1,2,#</sup>, Wezley C. Griffin<sup>1,2,#</sup>, Yuk-Cheung Chan<sup>3,#</sup>, Maxwell I. Martin<sup>1,2</sup>, Jose L. Alejo<sup>1,2</sup>, S. Kundhavai Natchiar<sup>1,2</sup>, Isaac J. Knudson<sup>4</sup>, Roger B. Altman<sup>1,2</sup>, Alanna Schepartz<sup>4,5,6,7,8</sup>, Scott J. Miller<sup>3,\*</sup>, and Scott C. Blanchard<sup>1,2,\*</sup>

<sup>1</sup>Department of Structural Biology, St Jude Children's Research Hospital, Memphis, Tennessee, USA

<sup>2</sup>Department of Chemical Biology & Therapeutics, St Jude Children's Research Hospital, Memphis, Tennessee, USA

<sup>3</sup>Department of Chemistry, Yale University, New Haven, Connecticut, USA

<sup>4</sup>College of Chemistry, University of California, Berkeley, California, USA

<sup>5</sup>Molecular and Cell Biology, University of California, Berkeley, CA 94720, USA

<sup>6</sup>California Institute for Quantitative Biosciences, University of California, Berkeley, CA 94720, USA

<sup>7</sup>Chan Zuckerberg Biohub, San Francisco, CA 94158, USA

<sup>8</sup>Innovation Investigator, ARC Institute, Palo Alto, CA 94304, USA

#Authors contributed equally.

\*To whom correspondence should be addressed: [scott.blanchard@stjude.org](mailto:scott.blanchard@stjude.org); [scott.miller@yale.edu](mailto:scott.miller@yale.edu)

## SUPPLEMENTAL FIGURE LEGENDS

**Supplemental Figure S1. Aminoacylation analysis of various aa-tRNA<sup>Phe</sup>-Cy3B.** **A)** Cartoon schematic of tRNA<sup>Phe</sup>-Cy3B charging and purification workflow (see methods for details). Deacylated tRNA<sup>Phe</sup>-Cy3B (variegated) is aminoacylated (**1**) mixed with an excess of flexizyme or tRNA synthetase. Addition of the specified parent (blue) or non-natural (red) amino acid initiates the acylation reaction and is allowed to proceed for the indicated time detailed in the Methods section. Aminoacylated species are then prepped and purified by hydrophobic interaction (HIC) (**2**) by monitoring the absorbance at 260 nm as outlined in the Methods. **B)** Representative HIC purification chromatograms of various parent and non-natural -tRNA<sup>Phe</sup>-Cy3B (various colors and indicated monomers) compared to deacyl-tRNA<sup>Phe</sup>-Cy3B (grey).

**Supplemental Figure S2. Ternary complex formation assay comparing Flexizyme and PheRS-charged L- $\alpha$ -Phe-tRNA<sup>Phe</sup>-Cy3B.** Ternary complex formation assay as described in Figure 2 comparing tRNA<sup>Phe</sup>-Cy3B charged by PheRS (blue) or flexizyme (green), and deacylated tRNA<sup>Phe</sup>-Cy3B (grey). Error bars represent S.D. from two separate replicates.

**Supplemental Figure S3. Mutant tRNA<sup>Phe</sup> (C49A G65U) and/or EF-Tu (N273A) examined by stopped-flow ternary complex formation.** **A)** Sequences of WT (left) and mutant (right) *E coli* tRNA<sup>Phe</sup> used for stopped-flow kinetic analysis. **B)** Structure of EF-Tu (PDB: 1OB2) with the N273 amino acid residue in the amino acid binding pocket shown next to the Phe aminoacylated to the A76 on the 3'-end of tRNA<sup>Phe</sup> (yellow). **C-E)** Stopped-flow ternary complex formation assays using Cy3B-labeled mutant aa-tRNA<sup>Phe</sup> (MUT) with the indicated monomers inset. **F-H)** Stopped-flow ternary complex assays with both tRNA<sup>Phe</sup> MUT and mutant EF-Tu N273A with the indicated monomers inset. Error bars represent S.D. of 3-5 replicates.

**Supplemental Figure S4. Kinetic simulations of ternary complex formation with S- $\beta^3$ -Phe.** **A)** Minimal reaction scheme for kinetic simulations. Contour plots of **B)** L- $\alpha$ -Phe and **C)** S- $\beta^3$ -Phe ternary complex abundance simulated at different physiologically relevant aa-tRNA and ET-Tu/Ts concentrations. Simulations were done using measured rate constants from experiments reported here and from the literature. Ternary complex fraction was calculated as  $[\text{aa-tRNA}]_{\text{bound}}/[\text{aa-tRNA}]_{\text{total}}$

**Figure S5. Manual modelling of aa-tRNA<sup>Phe</sup> into the EF-Tu binding pocket.** Manual modelling of **A)** L- $\alpha$ -Phe, **B)** *p*-Az-Phe, **C)** S- $\beta^2$ -Phe, **D)** S- $\beta^3$ -Phe, **E)** R- $\beta^2$ -Phe, **F)** R- $\beta^3$ -Phe into the amino acid binding pocket of EF-Tu formed by the DI-DII interface. Steric clashes are represented in red. The 2D model of non-natural amino acids was created using the Chemical Sketch Tool provided by the RCSB Protein Data Bank. Subsequently, the 3D atomic models and RNA-peptide links were constructed using JLigand<sup>80</sup>. The figures were generated using PYMOL, the PyMOL Molecular Graphics System, Version 2.5.7 Schrödinger, LLC.

## SUPPLEMENTAL FIGURES

### Supplemental Figure 1

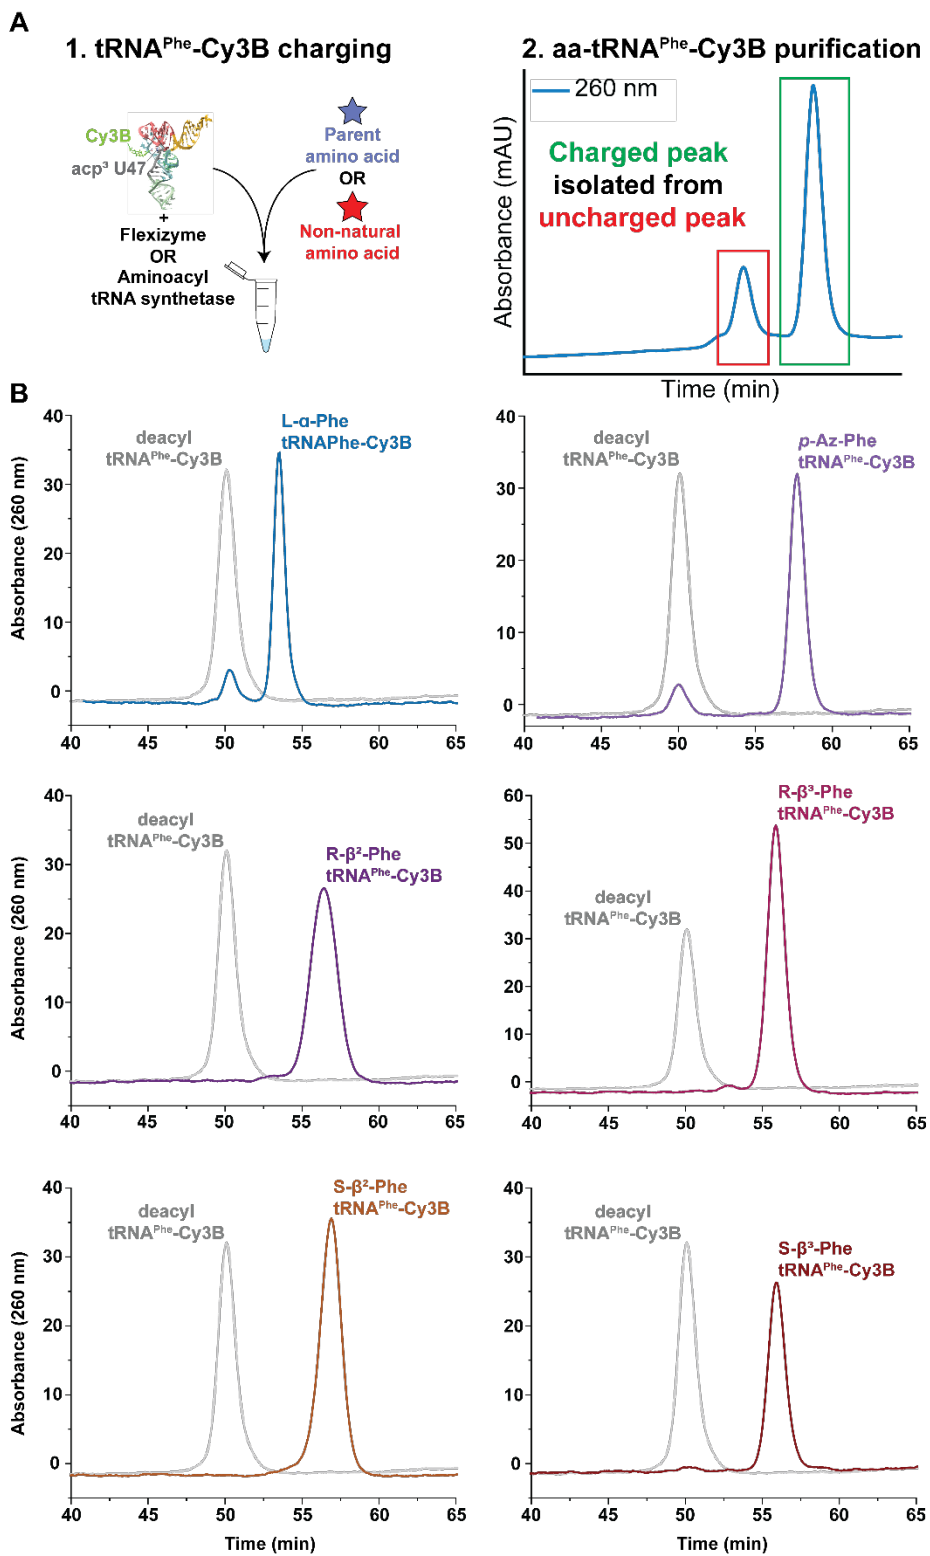

## Supplemental Figure 2

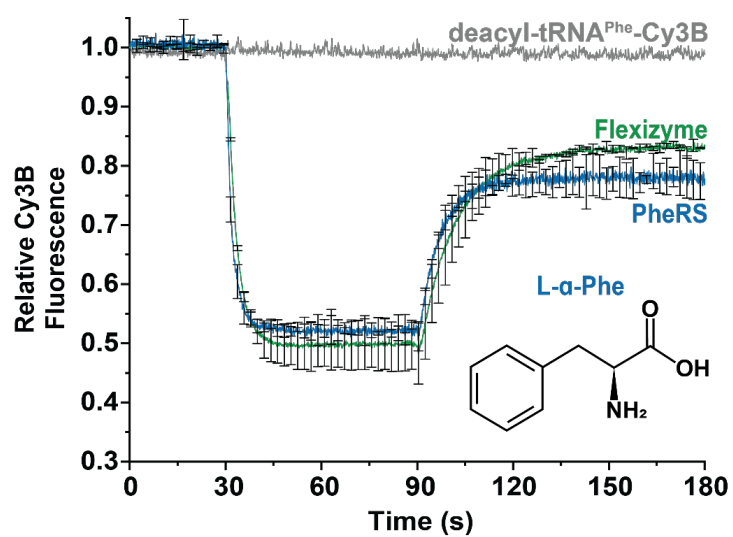

## Supplemental Figure 3

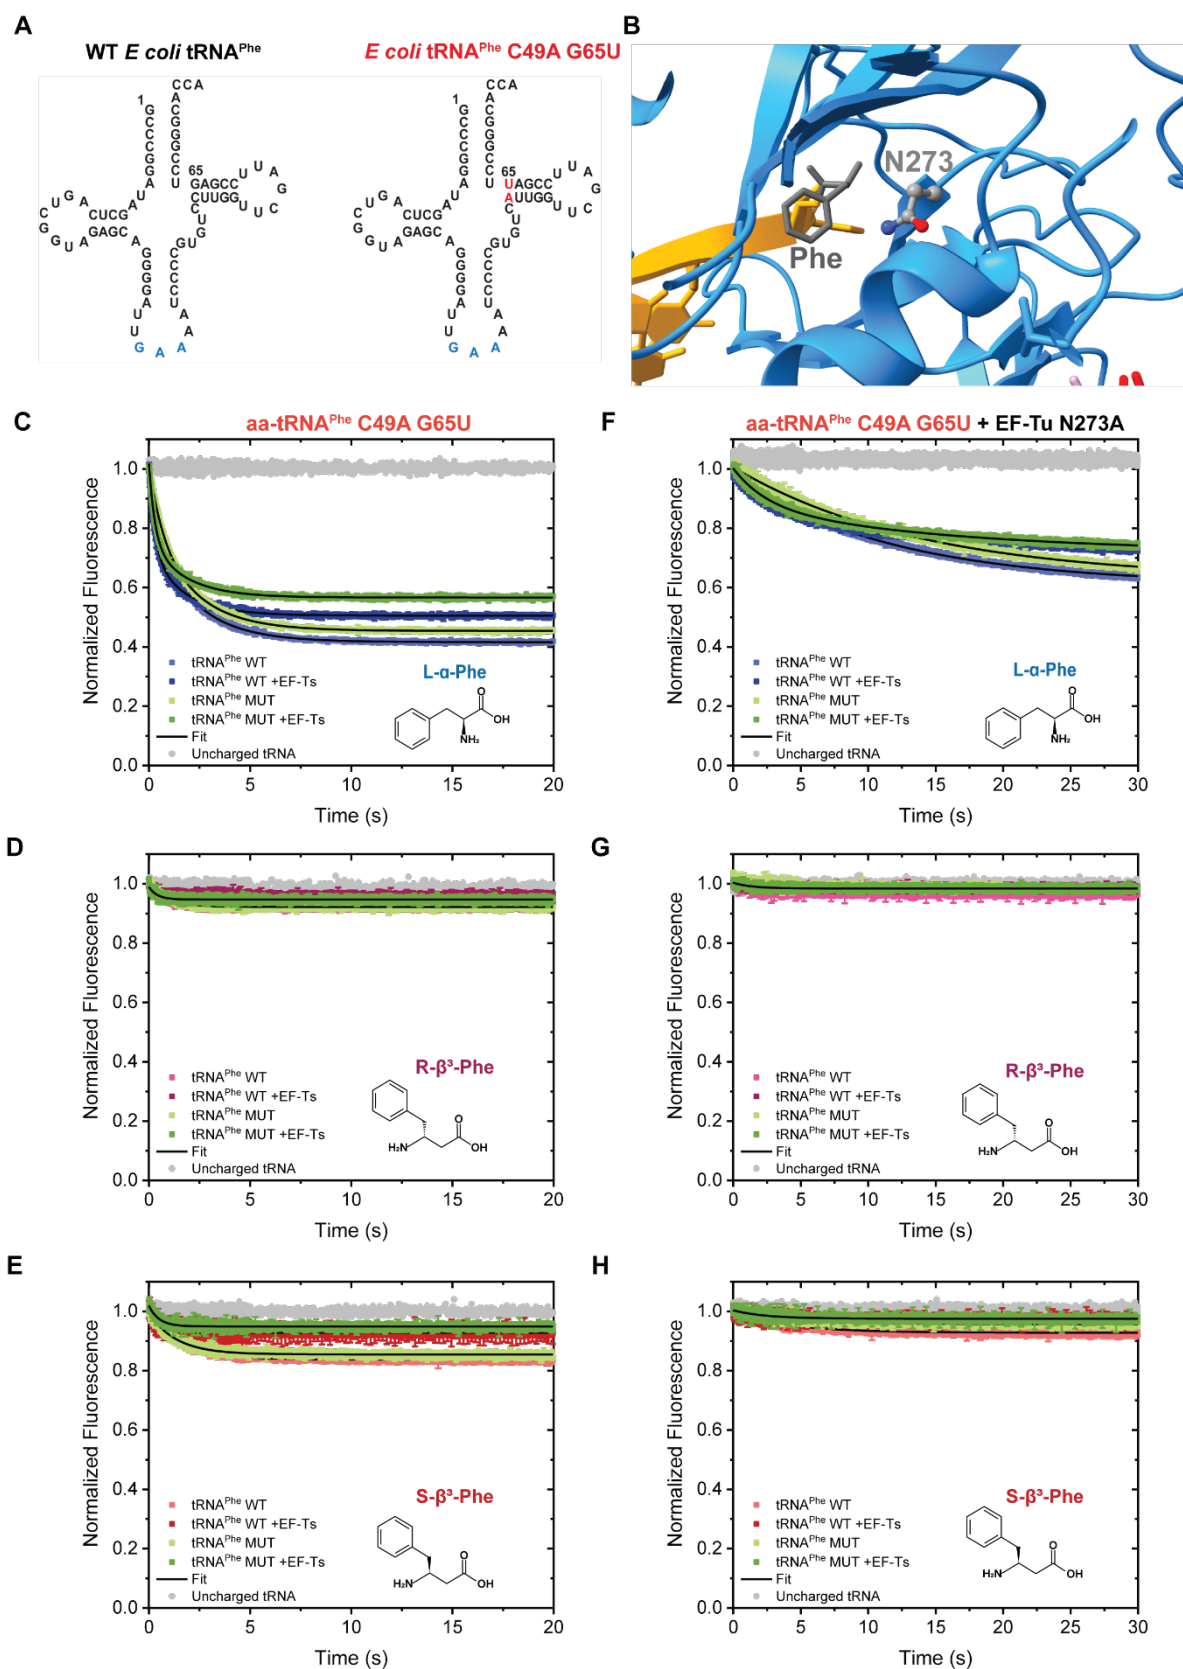

## Supplemental Figure 4

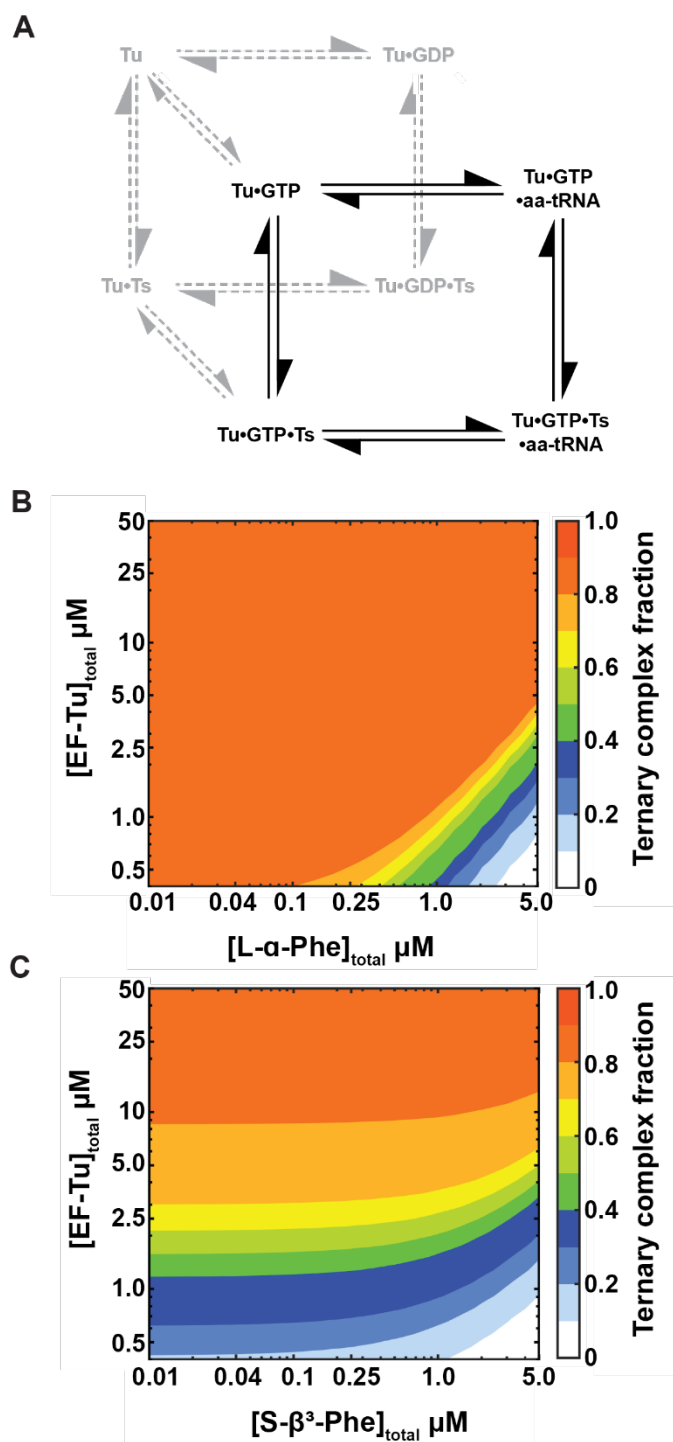

## Supplemental Figure 5

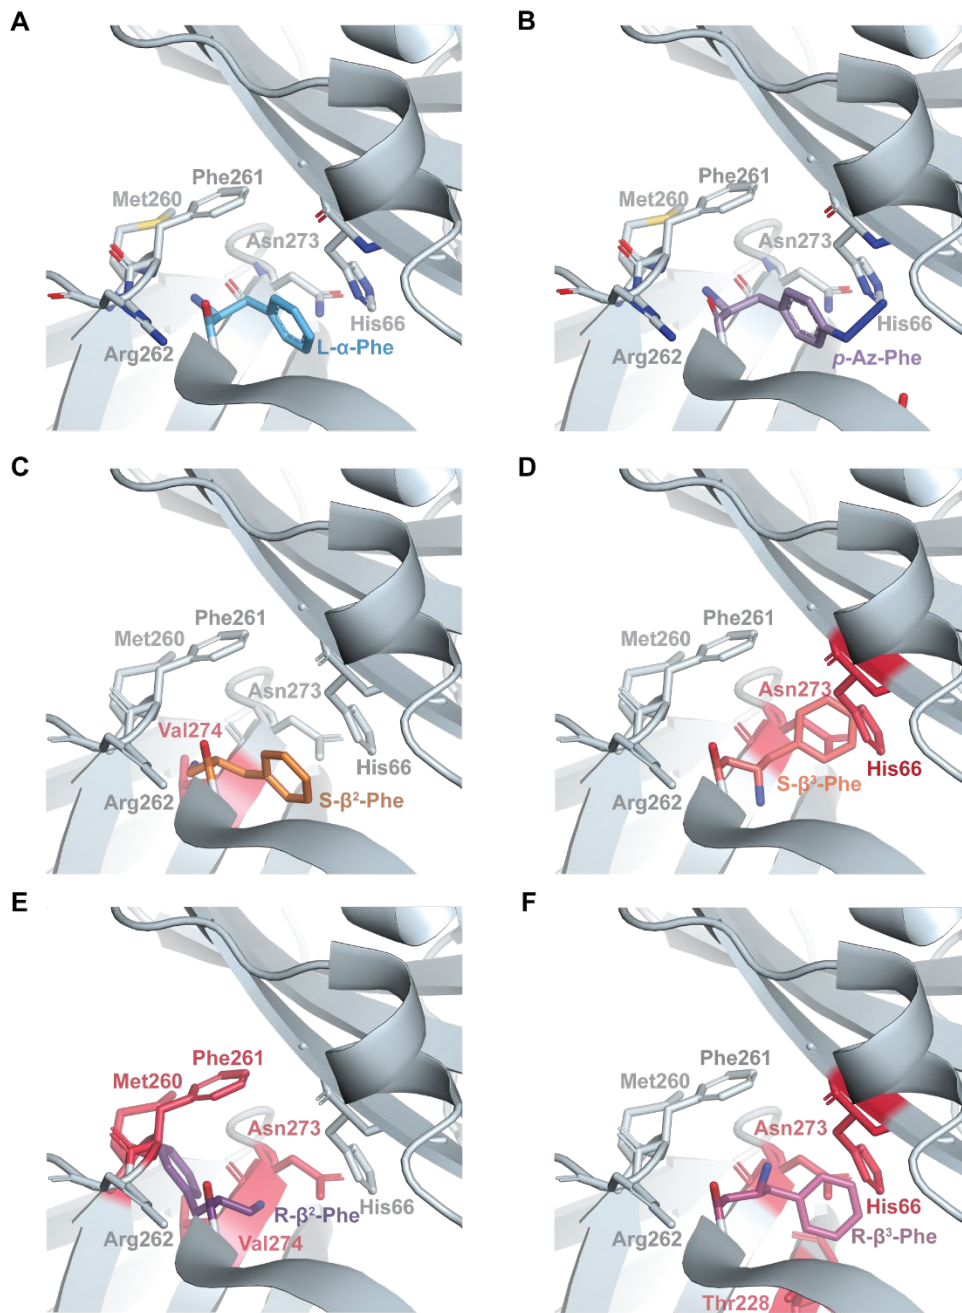

## SUPPLEMENTAL METHODS

### Synthesis of Boc-Protected $\beta^2$ -amino acid (Both enantiomeric forms)

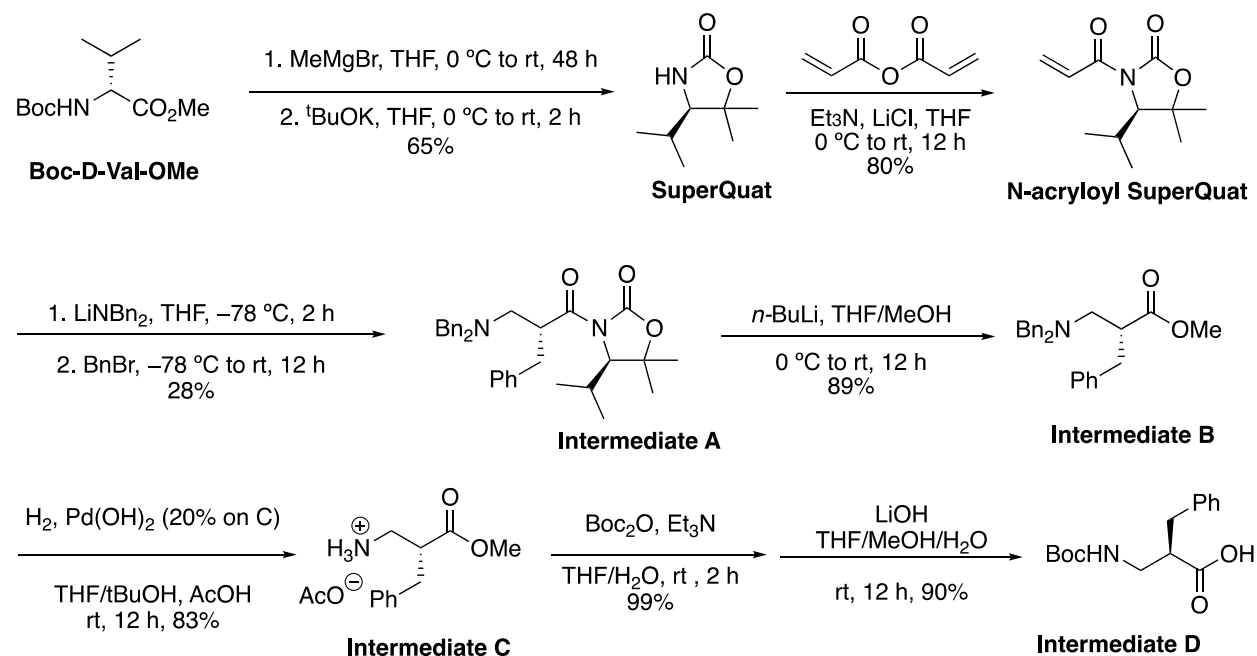

Note: The enantiomer of **Intermediate D** was prepared from Boc-L-Val-OMe.

**SuperQuat** and **N-acryloyl SuperQuat** were prepared according to literature procedure (Asymmetric synthesis of  $\beta^2$ -amino acids: 2-substituted-3-aminopropanoic acids from N-acryloyl SuperQuat derivatives. *Org. Biomol. Chem.*, **2007**, *5*, 2812–2825.) **Intermediate A** and **B** were also prepared according to the same literature. For **Intermediate A**, we used a different eluent system (hexanes:EtOAc 10 :1 to 7:1, instead of hexanes:Et<sub>2</sub>O 20:1 in the literature condition) for the SiO<sub>2</sub> column chromatographic purification to afford **Intermediate A** as pale yellow oil (980 mg, 1.96 mmol) in 28% yield (from 7 mmol **N-acryloyl SuperQuat**). For **Intermediate B**, same literature procedure was followed to afford **Intermediate B** as colorless oil (650 mg, 1.74 mmol) in 89% yield (from 1.96 mmol of **A**).

Note: The enantiomer of **Intermediate A** and **B** were prepared from Boc-L-Val-OMe as the starting material by the same procedure.



## Intermediate A

### (R)-3-((R)-2-benzyl-3-(dibenzylamino)propanoyl)-4-isopropyl-5,5-dimethyloxazolidin-2-one

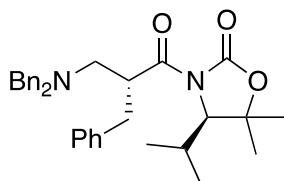

$^1\text{H}$  NMR (400 MHz,  $\text{CD}_2\text{Cl}_2$ )  $\delta$  7.42 – 7.26 (m, 15H), 4.94 (tt,  $J$  = 8.6, 6.0 Hz, 1H), 4.23 (d,  $J$  = 2.8 Hz, 1H), 3.73 (d,  $J$  = 13.6 Hz, 2H), 3.65 (d,  $J$  = 13.7 Hz, 2H), 3.11 – 2.89 (m, 3H), 2.59 (dd,  $J$  = 12.6, 5.6 Hz, 1H), 2.05 (pd,  $J$  = 6.9, 2.8 Hz, 1H), 1.53 (d,  $J$  = 3.0 Hz, 6H), 0.83 (d,  $J$  = 7.0 Hz, 3H), 0.69 (d,  $J$  = 6.8 Hz, 3H).

$^{13}\text{C}$  NMR (101 MHz,  $\text{CD}_2\text{Cl}_2$ )  $\delta$  175.6, 153.8, 139.6, 139.4, 129.7, 129.6, 128.8, 128.5, 127.3, 126.7, 82.7, 66.7, 58.9, 56.6, 43.1, 37.6, 29.9, 29.1, 21.5, 21.4, 16.6.

### enantiomer-Intermediate A

### (S)-3-((S)-2-benzyl-3-(dibenzylamino)propanoyl)-4-isopropyl-5,5-dimethyloxazolidin-2-one

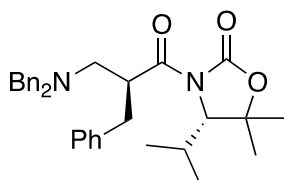

$^1\text{H}$  NMR (500 MHz,  $\text{CD}_2\text{Cl}_2$ )  $\delta$  7.39 – 7.18 (m, 15H), 4.84 (tt,  $J$  = 8.5, 6.0 Hz, 1H), 4.16 (d,  $J$  = 2.8 Hz, 1H), 3.65 (d,  $J$  = 13.6 Hz, 2H), 3.58 (d,  $J$  = 13.6 Hz, 2H), 3.02 – 2.90 (m, 2H), 2.85 (dd,  $J$  = 13.6, 8.8 Hz, 1H), 2.51 (dd,  $J$  = 12.6, 5.7 Hz, 1H), 2.06 – 1.95 (m, 1H), 1.49 (d,  $J$  = 13.8 Hz, 6H), 0.77 (d,  $J$  = 7.0 Hz, 3H), 0.63 (d,  $J$  = 6.8 Hz, 3H).

$^{13}\text{C}$  NMR (126 MHz,  $\text{CD}_2\text{Cl}_2$ )  $\delta$  175.6, 153.8, 139.6, 139.5, 129.6, 129.5, 128.7, 128.5, 127.3, 126.6, 82.8, 66.8, 58.9, 56.5, 43.1, 37.6, 29.9, 29.1, 21.5, 21.3, 16.6.

For **Intermediate B** to **Intermediate C**, we modified the condition (Literature: *Org. Biomol. Chem.*, **2007**, *5*, 2812–2825.) from Pd/C in MeOH/AcOH into Pd(OH)<sub>2</sub>/C (10% by weight w.r.t. substrate) in THF/*t*-BuOH (v:v, 3:1, 0.1 M) with AcOH (10% by volume) as additive.

**Intermediate B** (650 mg, 1.74 mmol) was dissolved in THF/*t*-BuOH (v:v, 3:1, total 16 mL, ca. 0.1 M) and AcOH (1.6 mL). Pd(OH)<sub>2</sub> (20% on carbon) (65 mg) was added to the solution. The reaction was degassed, connected to a H<sub>2</sub> balloon and stirred at rt for overnight before filtration over Celite. The filtrate was concentrated under reduced pressure to afford **Intermediate C** as oil (364 mg, 1.44 mmol, 83%) which was subjected to next step without further purification. Same experimental sequence was carried out to prepare the enantiomer of **Intermediate C**.

For **Intermediate C** to **Intermediate D**, **C** (364 mg, ca. 1.44 mmol, 1 equiv.) was dissolved in THF/H<sub>2</sub>O (6 mL:2 mL). Et<sub>3</sub>N (0.6 mL, 4.3 mmol, 3 equiv.) and Boc<sub>2</sub>O (377 mg, 1.7 mmol, 1.2 equiv.) were added. The solution was stirred at rt for 2 h before dilution with EtOAc (10 mL). The organic phase was washed successively with 10% citric acid solution, saturated NaHCO<sub>3</sub> solution

and brine. The organic phase was dried over anhydrous Na<sub>2</sub>SO<sub>4</sub>, filtered and concentrated to afford (*R*)-Boc-β<sup>2</sup>-Phe-OMe (423 mg, 1.44 mmol), which was subjected to next step without further purification. LiOH•H<sub>2</sub>O (242 mg, 7.2 mmol, 4 equiv.) and THF/MeOH/H<sub>2</sub>O (4 mL/1 mL/1 mL) were added to the crude product. The mixture was stirred at rt for overnight before dilution with 4 mL H<sub>2</sub>O. The aqueous phase was washed against Et<sub>2</sub>O (5 mL × 2), followed by acidifying with 1N HCl to adjust the pH into ~2. The aqueous phase was extracted with EtOAc (15 mL × 2), dried over anhydrous Na<sub>2</sub>SO<sub>4</sub>, filtered and concentrated under reduced pressure to afford **Intermediate D** (363 mg, 1.3 mmol, 90%) as a colorless oil. The same experimental sequence was carried out to prepare the enantiomer of **Intermediate D**.

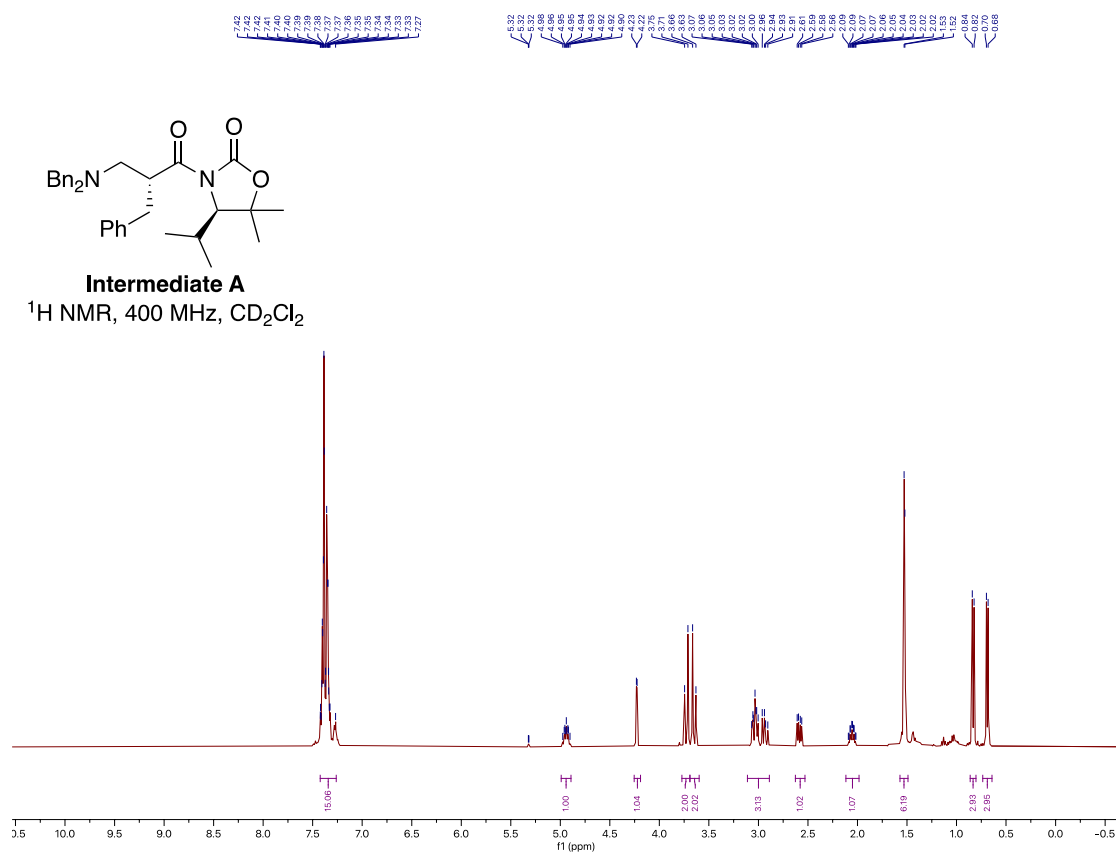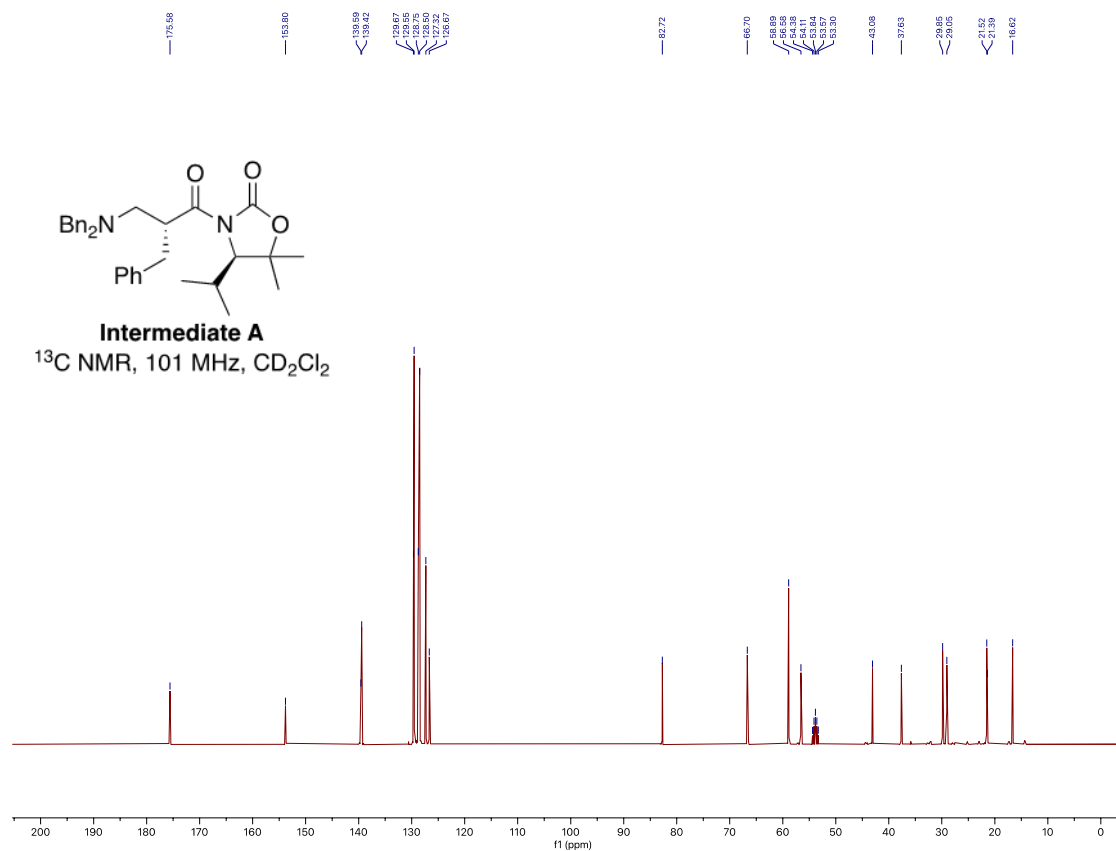





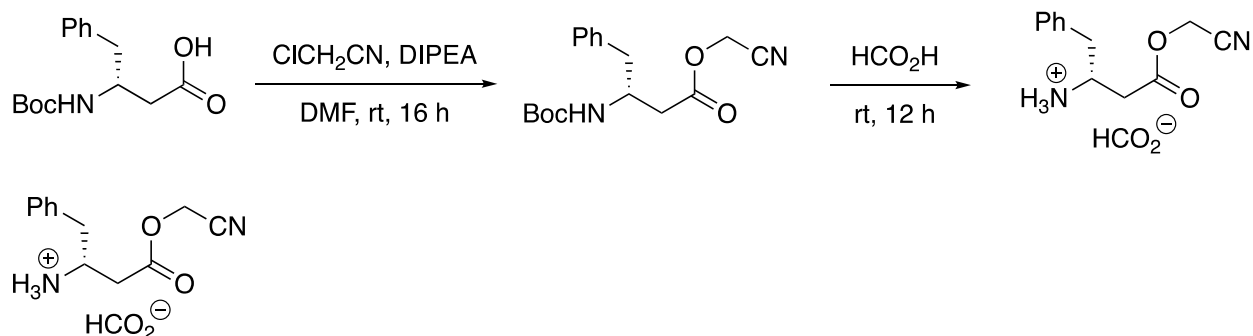

**(R)-4-(cyanomethoxy)-4-oxo-1-phenylbutan-2-aminium formate**

$^1\text{H}$  NMR (500 MHz,  $\text{CDCl}_3$ )  $\delta$  9.15 (s, 3H), 8.36 (s, 1H), 7.43 – 7.20 (m, 5H), 4.70 (s, 2H), 3.87 (s, 1H), 3.22 (dd,  $J$  = 13.6, 5.6 Hz, 1H), 3.01 – 2.70 (m, 3H).

$^{13}\text{C}$  NMR (126 MHz,  $\text{CDCl}_3$ )  $\delta$  169.8, 168.3, 135.5, 129.5, 129.2, 127.7, 114.4, 49.3, 49.0, 39.3, 35.9.

HRMS-ESI: calculated for  $[\text{C}_{12}\text{H}_{15}\text{N}_2\text{O}_2]^+$  219.1128, found 219.1144.

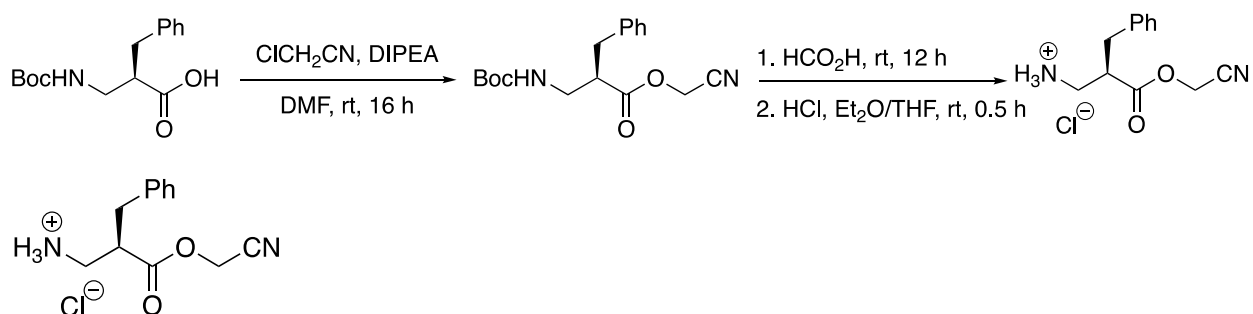

**(R)-2-benzyl-3-(cyanomethoxy)-3-oxopropan-1-aminium chloride**

Procedure for anion metathesis with chloride

After removal of residual formic acid from the Boc deprotection, the oily form product (formate salt) was dissolved in minimum amount of THF (*ca* 2 mL). HCl (1M in  $\text{Et}_2\text{O}$ ) (1.5 mL, 3 equiv.) was added. The solution was stirred for 0.5 h before concentration to dryness, and repetitively triturated with excess MTBE or  $\text{Et}_2\text{O}$  until white solid was formed persistently. All the residual solvent was removed under reduced pressure. The white solid was crushed into fine powder, rinsed thoroughly with  $\text{Et}_2\text{O}$  (10 mL) and dried over vacuum for overnight.

$^1\text{H}$  NMR (500 MHz,  $\text{DMSO}-d_6$ )  $\delta$  8.45 (s, 3H), 7.35 – 7.14 (m, 5H), 4.95 (s, 2H), 3.21 (ddq,  $J$  = 8.3, 6.0, 3.0 Hz, 1H), 3.08 – 2.96 (m, 2H), 2.90 (dd,  $J$  = 13.8, 8.0 Hz, 2H).

$^{13}\text{C}$  NMR (126 MHz,  $\text{DMSO}-d_6$ )  $\delta$  171.1, 137.3, 128.9, 128.5, 126.8, 115.6, 49.6, 44.3, 39.1.

HRMS-ESI: calculated for  $[\text{C}_{12}\text{H}_{15}\text{N}_2\text{O}_2]^+$  219.1128, found 219.1141.

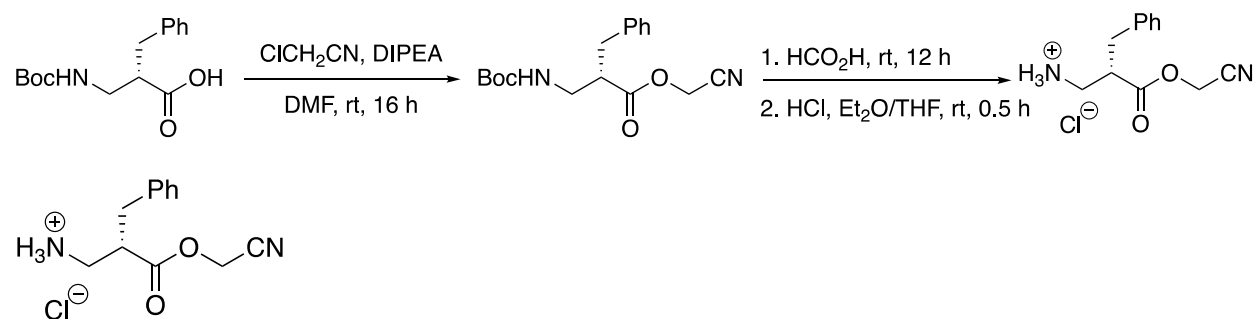

### (S)-2-benzyl-3-(cyanomethoxy)-3-oxopropan-1-aminium chloride

Following the procedure for anion metathesis with chloride.

<sup>1</sup>H NMR (500 MHz, DMSO-*d*<sub>6</sub>) δ 8.37 (s, 3H), 7.32 – 7.20 (m, 5H), 4.95 (s, 2H), 3.19 (td, *J* = 8.2, 4.1 Hz, 1H), 3.06 – 2.87 (m, 4H).

<sup>13</sup>C NMR (126 MHz, DMSO-*d*<sub>6</sub>) δ 171.1, 137.3, 128.9, 128.5, 126.8, 115.7, 49.6, 44.4, 39.1.

HRMS-ESI: calculated for [C<sub>12</sub>H<sub>15</sub>N<sub>2</sub>O<sub>2</sub>]<sup>+</sup> 219.1128, found 219.1137.







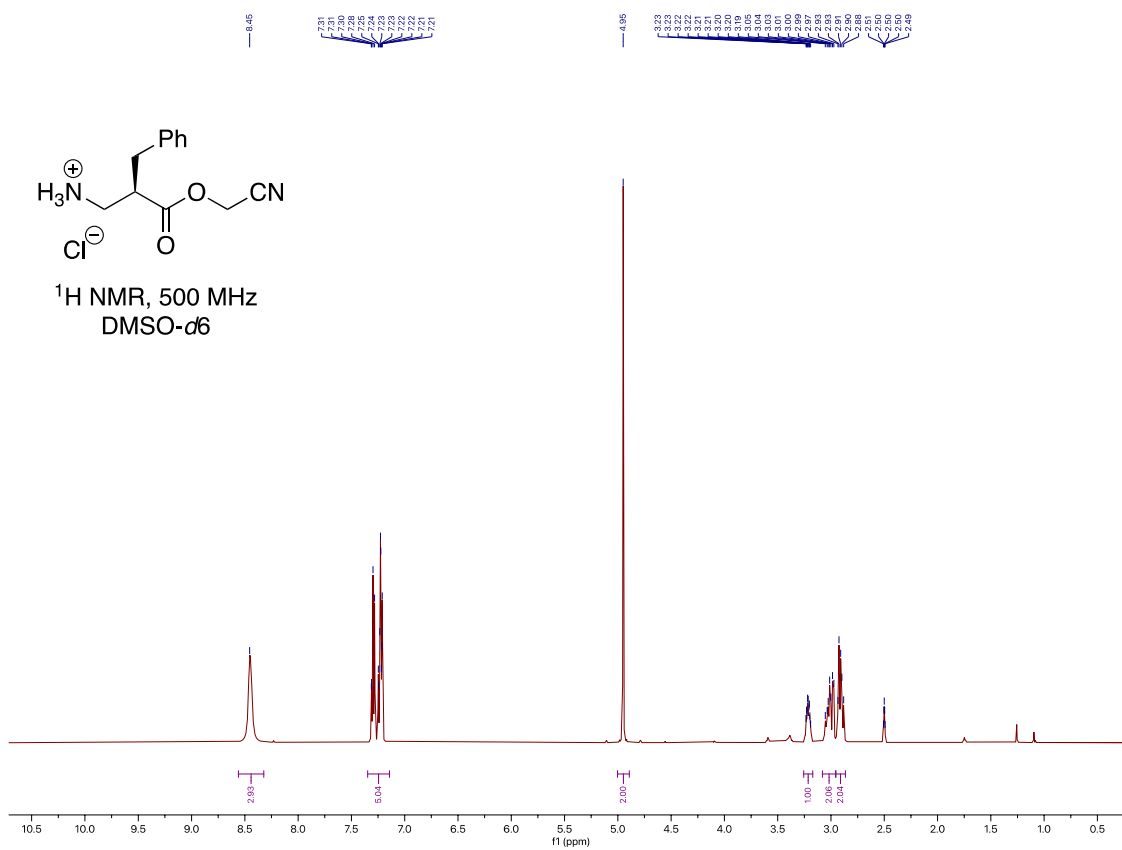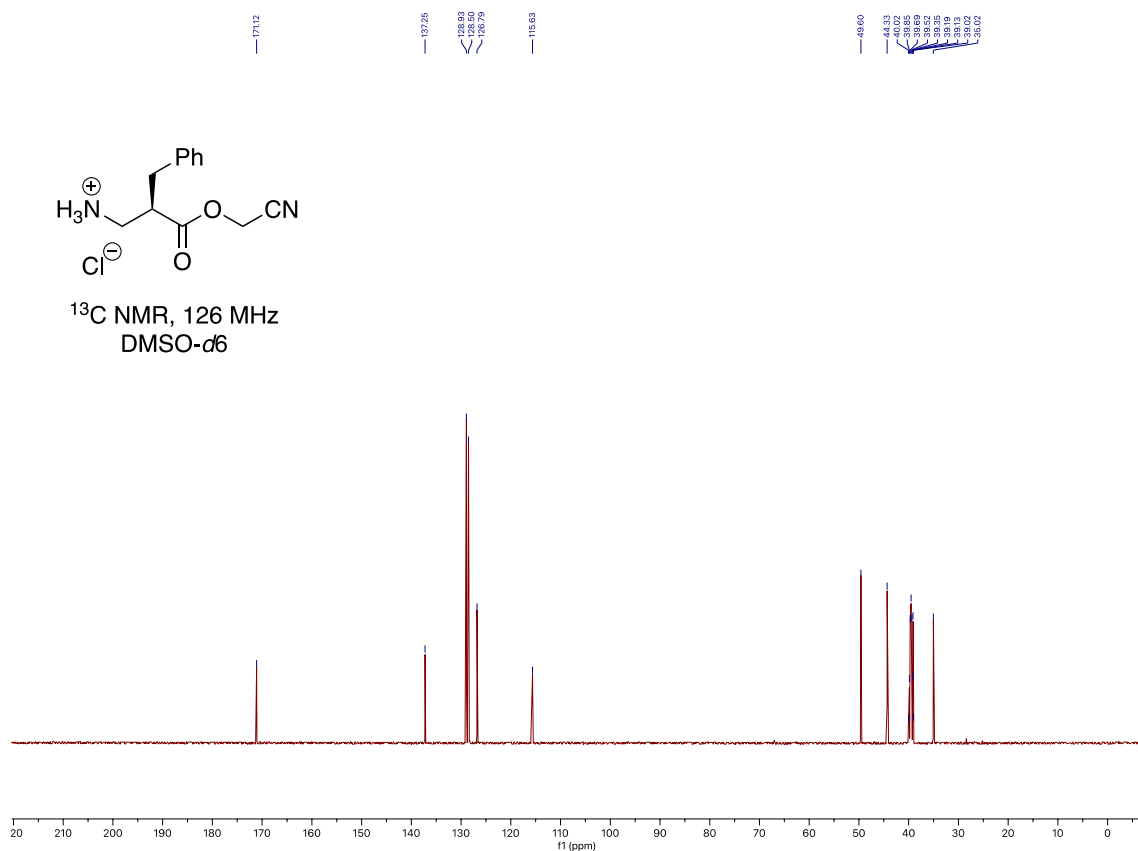





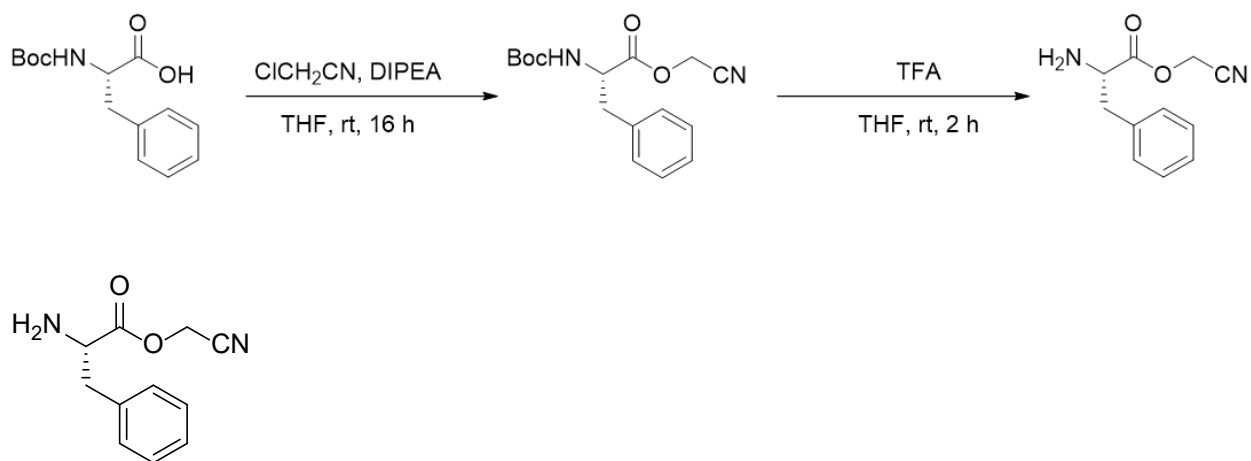

### Cyanomethyl-ester-L-phenylalanine

<sup>1</sup>H NMR (400 MHz, DMSO-*d*<sub>6</sub>) δ 8.58 (s, 2H), 7.33 (m, 5H), 5.10 (d, 2H), 4.47 (t, 1H), 3.12 (m, 2H). ESI-MS: calculated for [C<sub>11</sub>H<sub>13</sub>N<sub>2</sub>O<sub>2</sub>]<sup>+</sup> = 205.10, found 205.24.

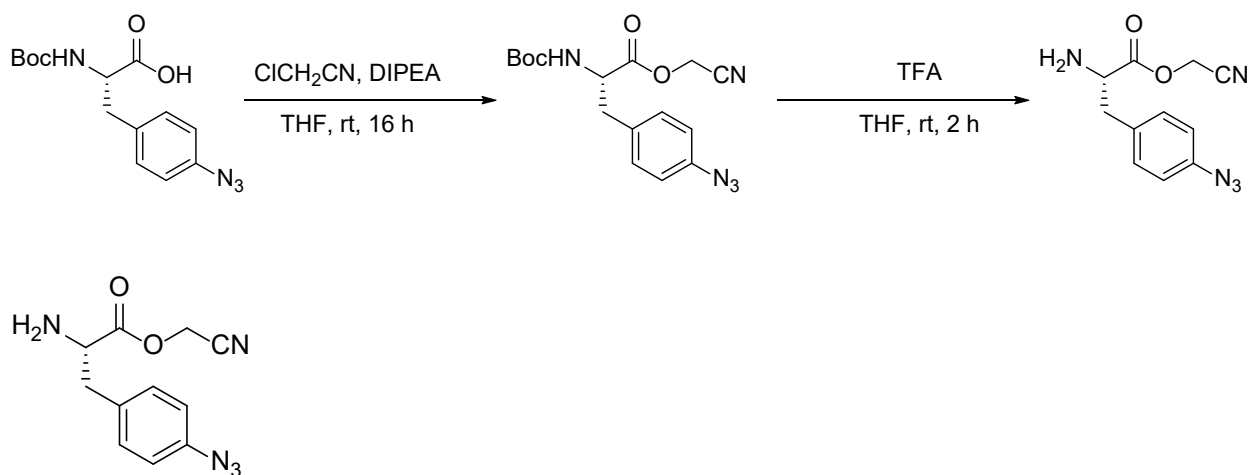

### 4-Azido-Cyanomethyl-Ester-L-Phenylalanine

<sup>1</sup>H NMR (400 MHz, DMSO-*d*<sub>6</sub>) δ 8.45 (s, 2H), 7.29 (d, 2H), 7.09 (d, 2H), 5.09 (d, 2H), 4.43 (t, 1H), 3.11 (m, 2H). ESI-MS: calculated for [C<sub>11</sub>H<sub>12</sub>N<sub>5</sub>O<sub>2</sub>]<sup>+</sup> = 246.10, found 246.15.
